# Supplementary material
Source: publisher figshare collection journal article supplement (https://karger.figshare.com/articles/dataset/_/5422639)
Supplement: Supplementary file 1 [file 1]

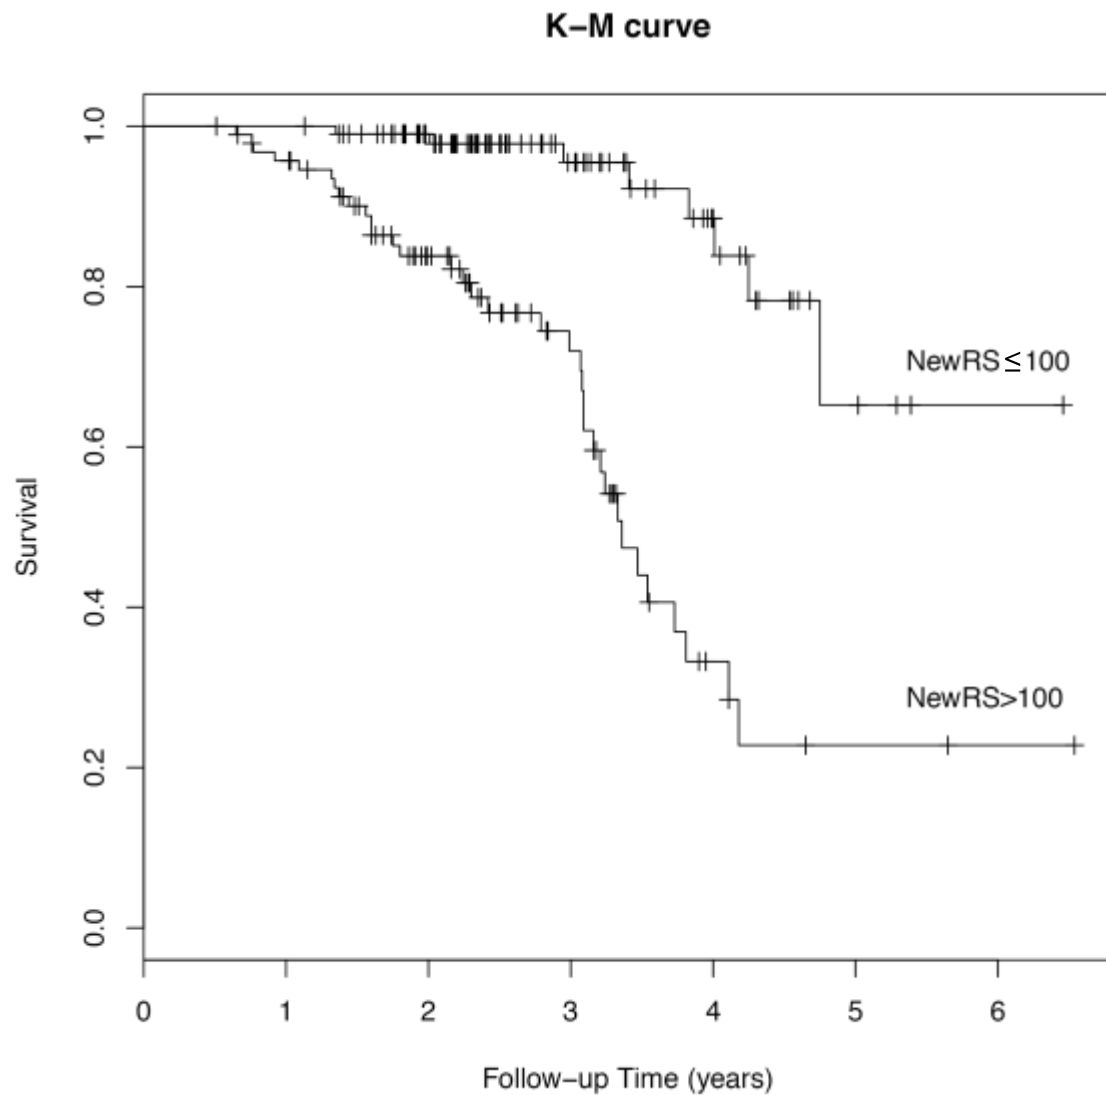

Supplementary Figure 1. Kaplan-Meier curves of patients with higher risk-score and those with lower risk-score according to cut-off value of 100.

Cox regression analysis showed that patients with higher risk-score had higher risk of progression to dementia than those with lower risk-score (hazard ratio = 7.21, 95% CI = 3.32-15.65).
